# Supplementary material
Source: Springer Nature journal article supplement (http://www.springermedizin.de/resource/supplementary/13019_2011_504_MOESM1_ESM.pdf/9638510)

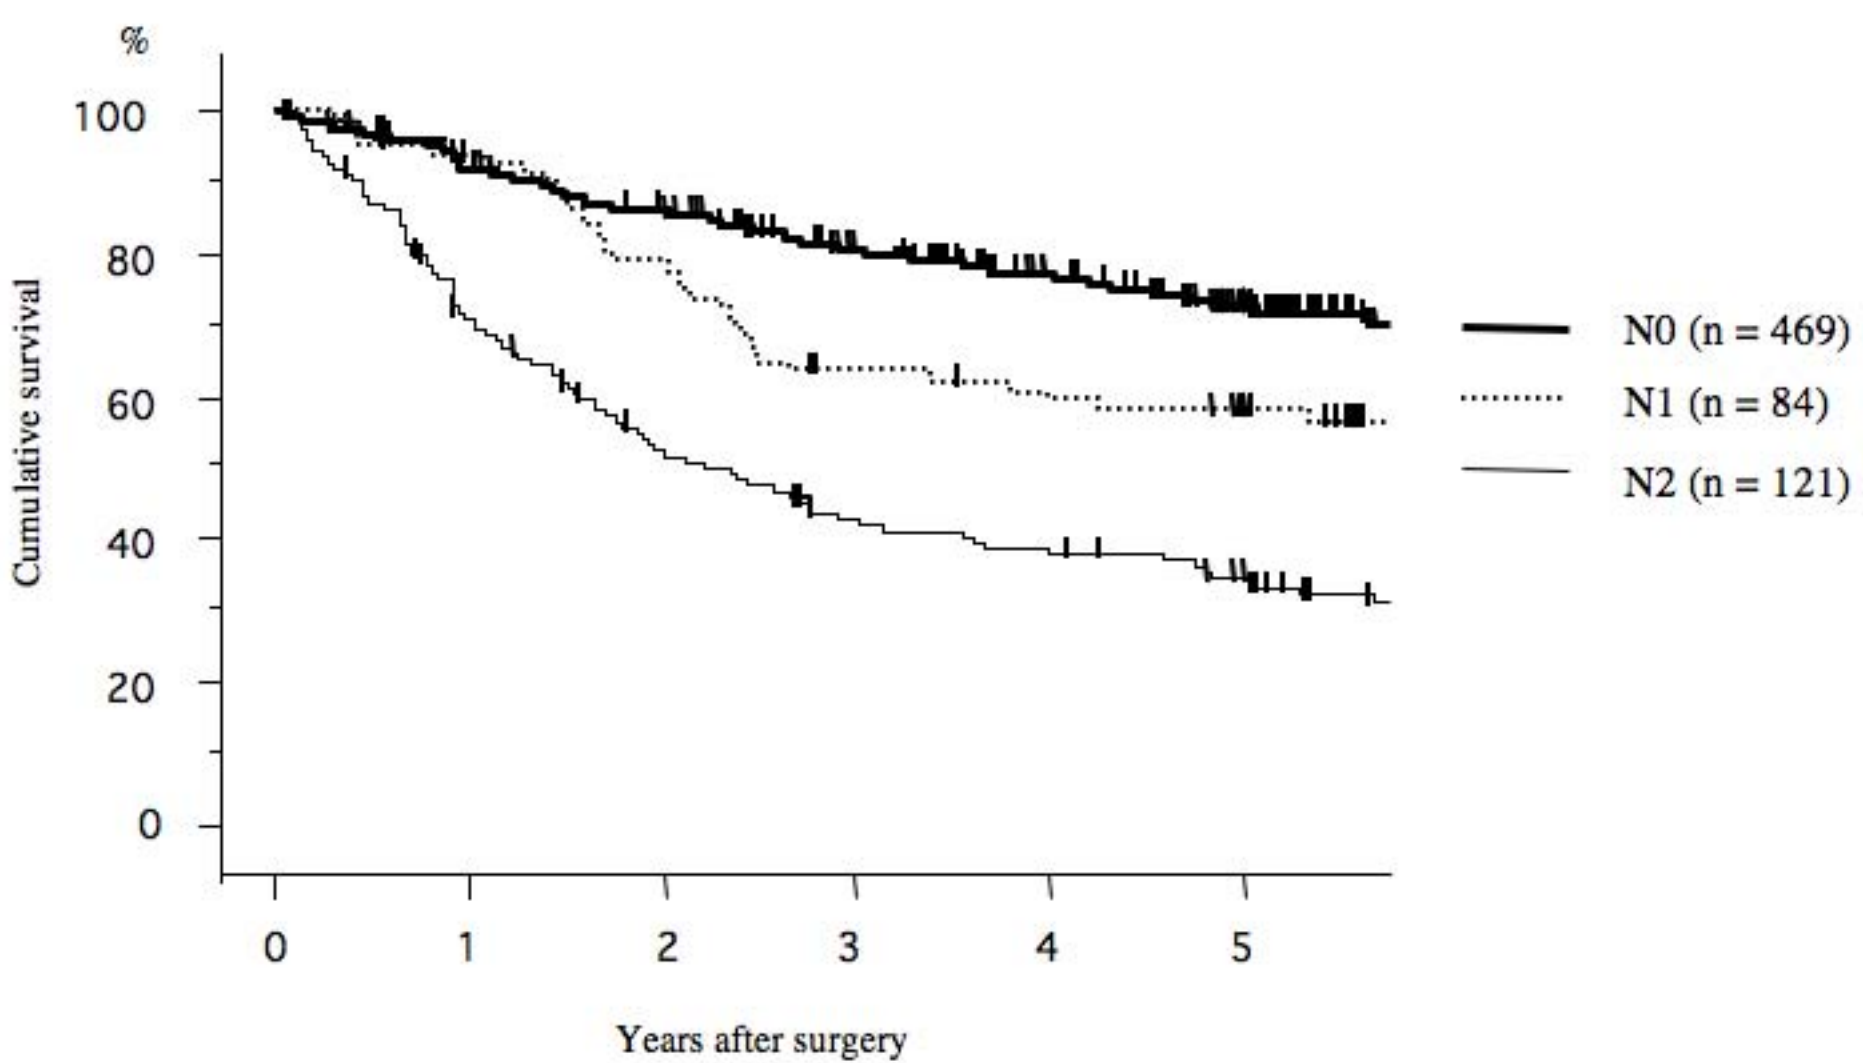

Supplement: MOESM1 [file 9638510]
